# Supplementary material for: Interfacial encapsulation stress management of micron-sized porous SiO anodes for high-energy lithium-ion batteries
Source: Royal Society of Chemistry journal article supplement (doi:10.1039/d2ta08459g), 2022-12-02
Supplement: d2ta08459g1.pdf [file d2ta08459g1.pdf]

## Supplementary Material:

### **Interfacial Encapsulation Stress Management of Micron-Sized Porous SiO Anodes for High-Energy Lithium-ion Batteries**

Xiao Fang,<sup>a</sup> Guanjia Zhu,<sup>\*b</sup> Shuai Yuan,<sup>c</sup> Lingling Wang,<sup>a</sup> Liyi Shi,<sup>c,d</sup> Wei Yu,<sup>\*a</sup> and Haijiao Zhang<sup>\*b</sup>

<sup>a</sup>School of Energy and Materials, Shanghai Polytechnic University, Shanghai 201209, P. R. China

<sup>b</sup>Institute of Nanochemistry and Nanobiology, Shanghai University, Shanghai 200444, P. R. China

<sup>c</sup>Research Center of Nanoscience and Nanotechnology, Shanghai University, Shanghai 200444, P. R. China

<sup>d</sup>Emerging Industries Institute, Shanghai University, Zhejiang 314006, P. R. China

\* Corresponding authors

E-mail: [hjzhang128@shu.edu.cn](mailto:hjzhang128@shu.edu.cn), [yuwei@sspu.edu.cn](mailto:yuwei@sspu.edu.cn), [zhuguanjia@shu.edu.cn](mailto:zhuguanjia@shu.edu.cn)

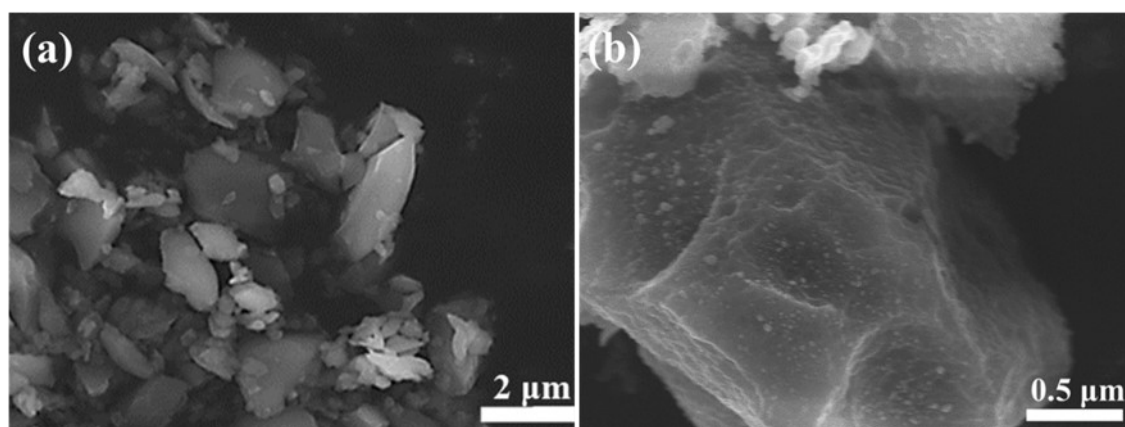

**Fig. S1** SEM images of (a) SiO, (b) Ag-deposited SiO.

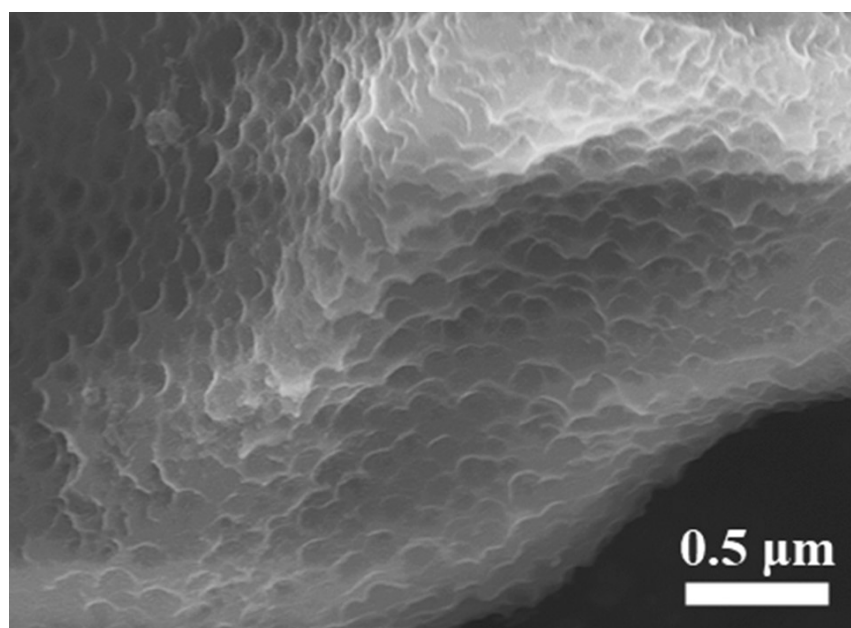

**Fig. S2** SEM image of p-SiO.

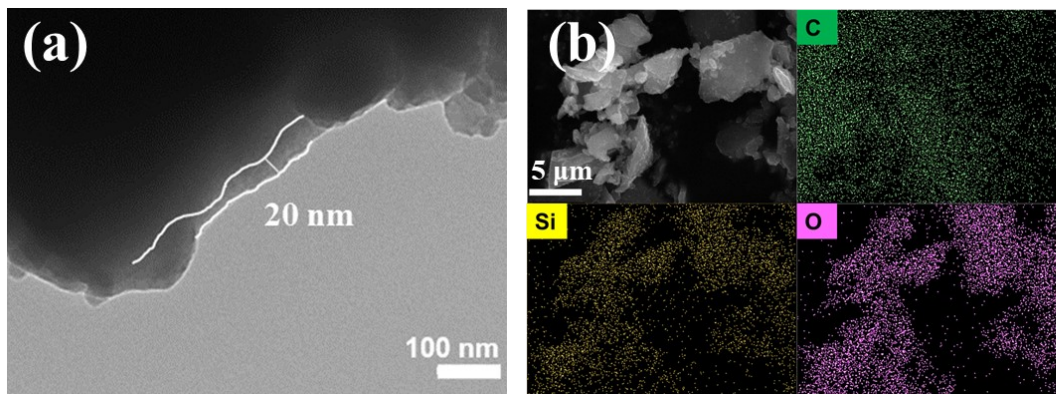

**Fig. S3** TEM image (a) and (b) SEM image and corresponding elemental mapping of p-SiO@C.

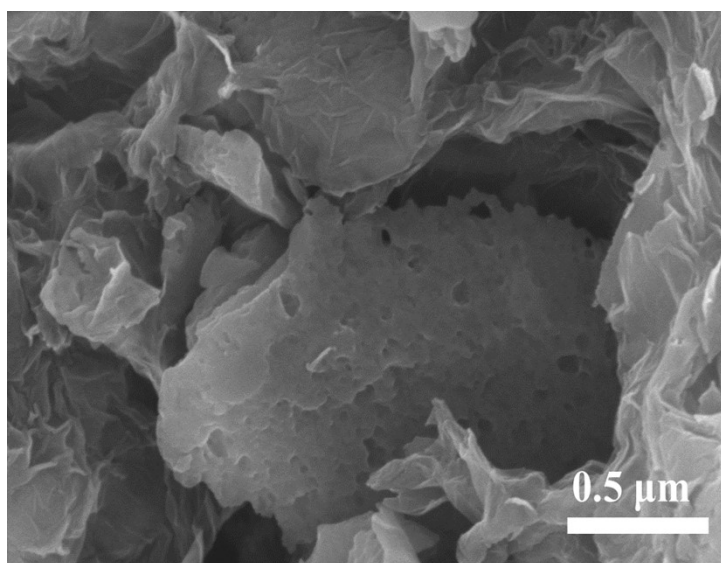

**Fig. S4** SEM image of p-SiO@C@rGO.

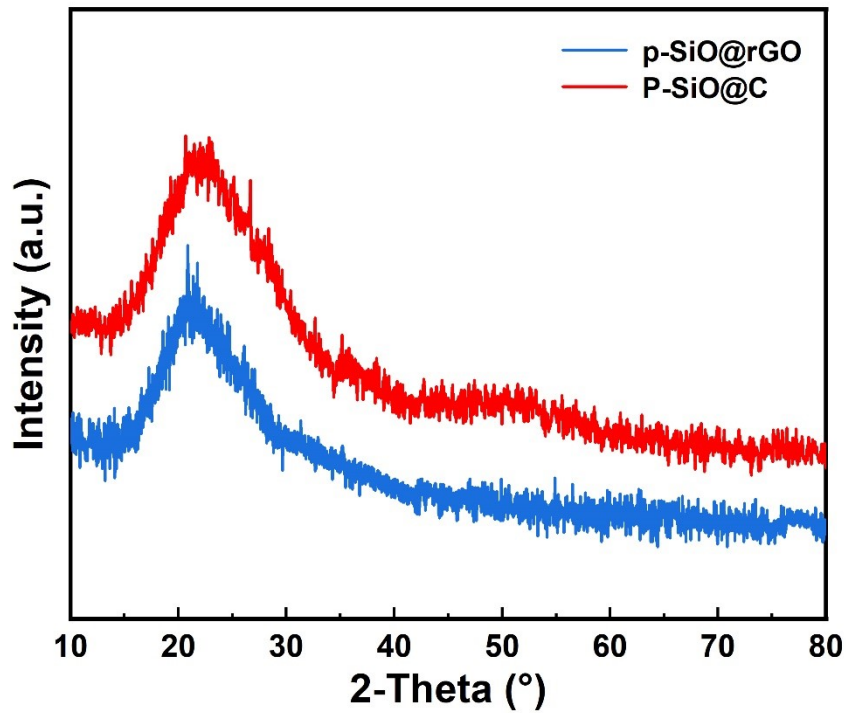

Fig. S5 XRD patterns of p-SiO@C and p-SiO@rGO.

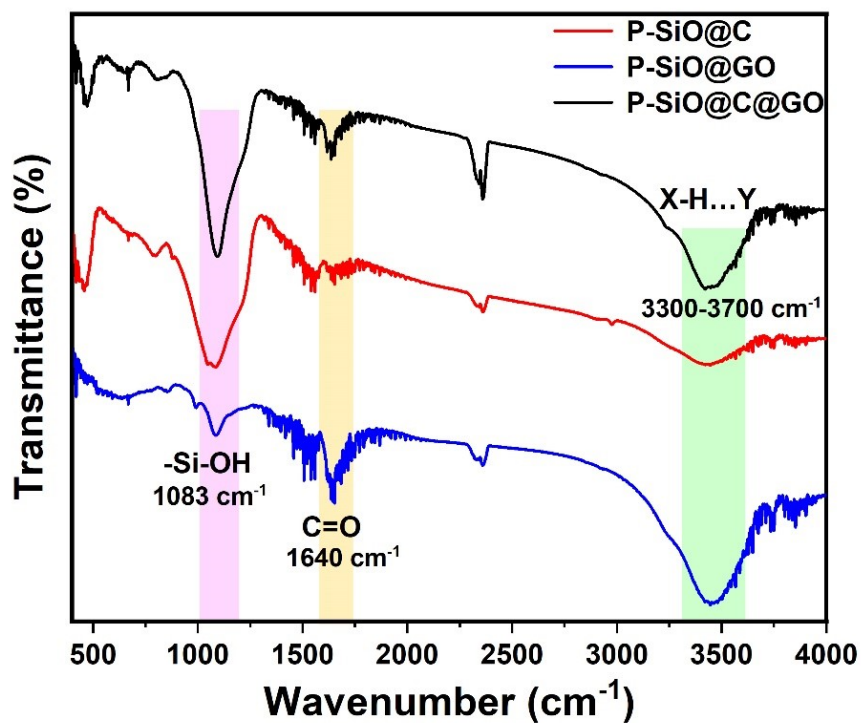

Fig. S6 FT-IR spectra of p-SiO@C@rGO, p-SiO@C, and p-SiO@rGO.

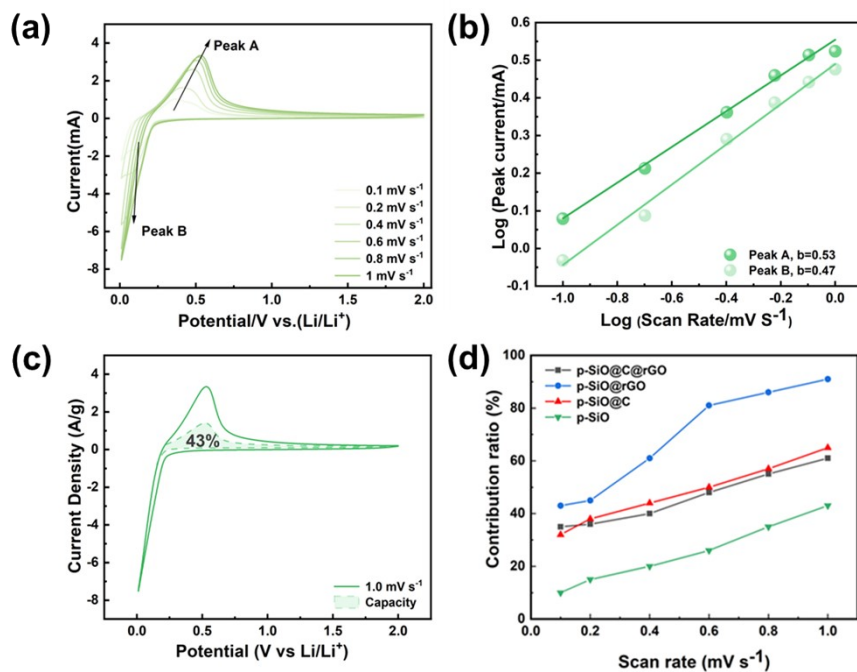

**Fig. S7** (a) CV curves of p-SiO at various scan rates of 0.1-1.0  $\text{mV s}^{-1}$ , (b) Relationship between the logarithm peak currents and logarithm sweep rates, and (c) Capacitive and diffusion-controlled contribution to charge storage at 1.0  $\text{mV s}^{-1}$ . (d) The percentages of capacitive and diffusion-controlled capacities at different scan rates of p-SiO@C@rGO, p-SiO@C, p-SiO@rGO and p-SiO electrodes.

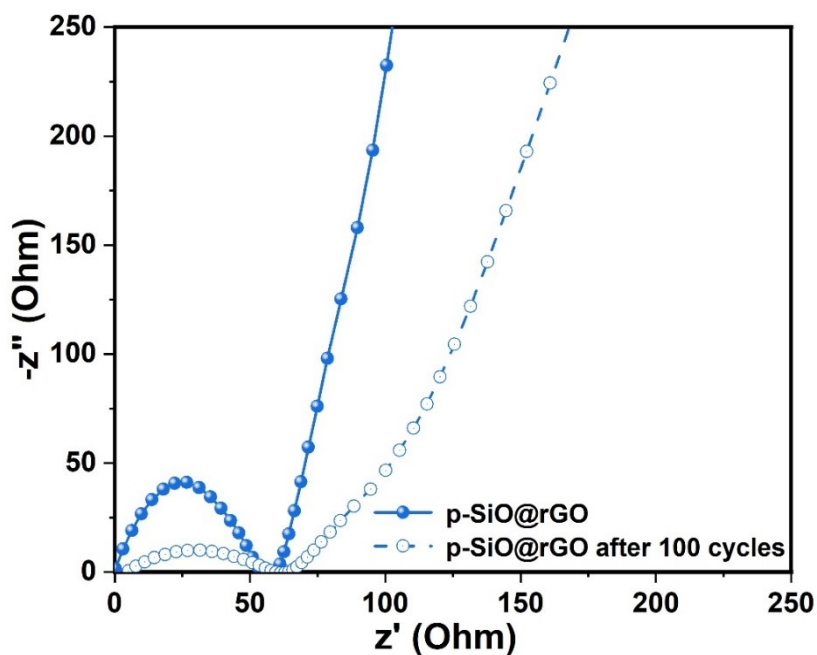

**Fig. S8** Electrochemical impedance spectra of the p-SiO@rGO electrode.

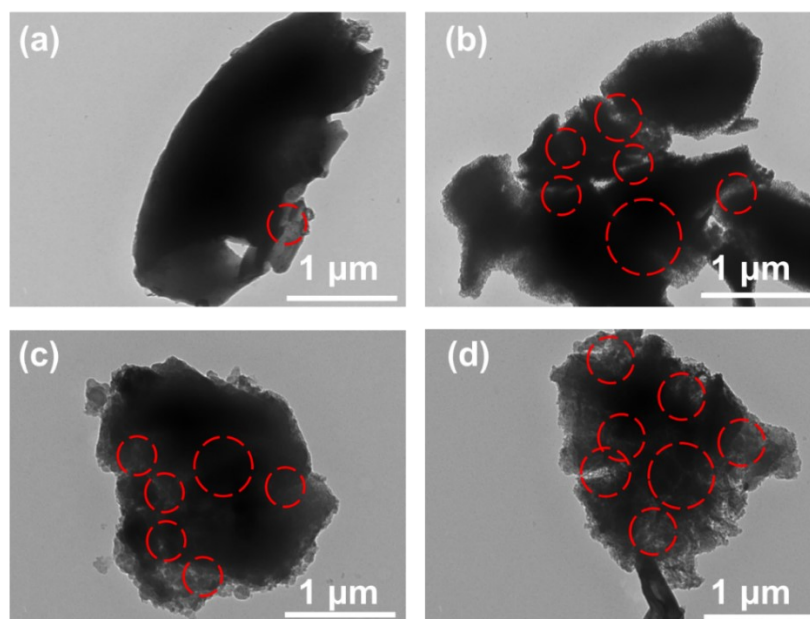

**Fig. S9** TEM images of (a) p-SiO@rGO, (b) p-SiO@C, (c) p-SiO@C@rGO and (d) p-SiO electrodes after cycling. The surface cracks of the particles are marked with red dashed circles.

**Table S1** Initial capacity information of four samples.

|             | Charge specific capacity /mAh g <sup>-1</sup> | Discharge specific capacity /mAh g <sup>-1</sup> | C ratio / % | Theoretical specific capacity /mAh g <sup>-1</sup> | Initial lithiation extent /% |
|-------------|-----------------------------------------------|--------------------------------------------------|-------------|----------------------------------------------------|------------------------------|
| p-SiO       | 818.55                                        | 1470.7                                           | 0           | 2680.0                                             | 54.9                         |
| p-SiO@C     | 1635.9                                        | 2314.6                                           | 7.1         | 2516.1                                             | 92.0                         |
| p-SiO@rGO   | 1757.0                                        | 2299.9                                           | 13.9        | 2359.2                                             | 97.5                         |
| p-SiO@C@rGO | 1298.8                                        | 2086.5                                           | 20.2        | 2213.8                                             | 94.2                         |

*The reversible ratio capacity was calculated as follows:*

Taking p-SiO@rGO as an example: Based on the ratio (13.9 %) of C content in p-SiO@rGO and the theoretical capacity (372 mAh g<sup>-1</sup>), it is known that 86.1 % of p-SiO with a theoretical capacity of 2680 mAh g<sup>-1</sup>. The theoretical capacity of p-SiO@rGO can be calculated as 2359.2 mAh g<sup>-1</sup> (13.9 % × 372 mAh g<sup>-1</sup> + 86.1 % × 2690 mAh g<sup>-1</sup>). And then, the reversibility of p-SiO@rGO was calculated to be 97.5% using the following equation.

$$\text{Initial lithiation extent} = \frac{\text{Discharge specific capacity}}{\text{Theoretical specific capacity}} \%$$
